## 20 **Abstract**

21 Recently, molecular studies have uncovered significant cryptic diversity in the Mexican  
22 Highlands, leading to the description of many new endemic species. DNA approaches to this  
23 kind of species discovery have included both mitochondrial DNA (mtDNA) sequencing and  
24 multilocus genomic methods. While these marker types have often been pitted against one  
25 another, there are benefits to deploying them together, as linked mtDNA data can provide the  
26 bridge between uncovering lineages through rigorous multilocus genomic analysis and  
27 identifying lineages through comparison to existing mtDNA databases. Here, we apply one  
28 class of multilocus genomic marker, ultraconserved elements (UCEs), and linked mtDNA data  
29 to a species complex of frogs (*Sarcohyala bistincta*) found in the Mexican Highlands. We generated  
30 data from 1,891 UCEs, which contained 1,742 informative SNPs for *S. bistincta* and closely  
31 related species and captured mitochondrial genomes for most samples. Genetic analyses based  
32 on both whole loci and SNPs agree there are numerous distinct and divergent lineages within *S.*  
33 *bistincta*. The SNP-based species tree provides the most conservative estimate of 8 well-  
34 supported lineages in three major clades. Having linked mtDNA data allowed us to tap into the  
35 large number of mtDNA sequences available on GenBank and identify one of these lineages as  
36 an already-described species, *S. pentheter*. One identified clade (containing 2 of the 8 lineages)  
37 was 10% divergent in mtDNA and paraphyletic with other *S. bistincta*, making this clade a clear  
38 candidate for species status. Phylogenies from UCEs and mtDNA mostly agreed in their  
39 topologies, but differed in that mtDNA suggested a more complex evolutionary history perhaps  
40 influenced by gene flow between some neighboring lineages. Our study demonstrates that the  
41 Mexican Highlands still hold substantial undescribed diversity. Combining multilocus genomic  
42 data with linked mtDNA data is a useful approach for identifying potential new species and  
43 associating them with already described taxa, which is especially important in groups with  
44 undescribed subadult phenotypes, where geographic ranges are unclear, or where phenotypes  
45 are conserved.

46

47 Keywords: ultraconserved elements, genomics, population genetics, phylogeography,  
48 phylogenetics, systematics, species limits, Hylinae

## 49 Introduction

50 The Mexican Highlands are a global biodiversity hotspot (Myers et al. 2000). Recent molecular  
51 studies have uncovered significant cryptic diversity in the Mexican Highlands, leading to the  
52 description of new endemic species or the elevation of former subspecies to species rank  
53 (Bryson et al. 2010; Bryson et al. 2012; Bryson et al. 2011; McCormack et al. 2008; Rovito et al.  
54 2015). At the same time, habitat loss threatens many of these species before they have even been  
55 described (Ponce-Reyes et al. 2012). Amphibians are particularly sensitive to habitat alterations,  
56 and many are threatened by habitat loss and invasive diseases (Stuart et al. 2008). Because most  
57 amphibians have reduced dispersal, they also show patterns of microendemism (Parra-Olea et  
58 al. 2014), meaning that important pockets of diversity and new species are still being uncovered  
59 in the Mexican Highlands (Campbell et al. 2009; Meik et al. 2006).

60 We investigate potential cryptic diversity within the *Sarcohyla bistincta* species complex  
61 in the Mexican Highlands. The genus *Sarcohyla*, which is considered distinct from *Plectrohyla* by  
62 some authors to reflect those species west of the Isthmus of Tehuantepec (Duellman et al. 2016),  
63 contains 24 species of stream-dwelling frogs, many of them critically endangered and many that  
64 have never been seen after their original discovery (references compiled in Stuart et al. 2008).  
65 Some species are thought to be in serious decline or extinct (Lips et al. 2004). The actual number  
66 of species, their relationships, and geographic ranges are not well known (Duellman 2001;  
67 Duellman et al. 2016; Faivovich et al. 2009). *S. bistincta* is the most broadly distributed member  
68 of the genus. It occurs in several mountain ranges separated by lowland barriers and might  
69 therefore be comprised of multiple species.

70 We sought to assess potential cryptic diversity in *S. bistincta* using multilocus genomic  
71 markers collected via next-generation sequencing (NGS) as well as mitochondrial DNA  
72 (mtDNA) data. Often, mtDNA and multilocus nuclear markers have been pitted against one  
73 another in biodiversity discovery (Edwards & Bensch 2009; Moritz & Cicero 2004; Zink &  
74 Barrowclough 2008). Mitochondrial DNA offers many benefits, including economy, efficiency,  
75 and wide comparative potential across species and studies. Consequently, there is now a vast

76 trove of mtDNA sequences on GenBank. A drawback of using only mtDNA is that a single  
77 marker will often fail to accurately depict the speciation process (Edwards & Bensch 2009). In  
78 response, multilocus methods have multiplied (Edwards 2009; Fujita et al. 2012). While multiple  
79 loci help model a more realistic speciation process, multilocus studies suffer from the lack of a  
80 standardized marker set, which limits the ability to link uncovered lineages with species  
81 already identified and described in prior studies and in public databases. This is especially  
82 important in groups with multiple subadult phenotypes (e.g., insects and frogs) and where  
83 adult phenotypes are conserved across species. While many studies have used both types of  
84 markers, few have explicitly explored the benefits of linked mtDNA and NGS data at the level  
85 of the individual for lineage discovery and identification.

86 For our multilocus genomic markers, we use ultraconserved elements (UCEs). UCEs are  
87 an appealing multilocus marker set because the same loci are found across major branches of  
88 the tree of life, where they act as anchors for variable DNA in flanking regions (Faircloth et al.  
89 2012). For instance, it is possible to capture the same set of 1000 or more UCEs across all  
90 mammals (McCormack et al. 2012), all reptiles (Crawford et al. 2012), or hundreds of UCEs  
91 across arachnid lineages separated by hundreds of millions of years (Starrett et al. 2016). While  
92 the power of UCEs for deep-level systematics is clear, their utility at shallower scales around the  
93 species level is still coming into focus (McCormack et al. 2016; Smith et al. 2014; Zarza et al.  
94 2016). An added benefit of the UCE enrichment process (and all so-called “sequence capture”  
95 methods) is that whole mtDNA genomes are often captured as off-target “bycatch” (do Amaral  
96 et al. 2015), meaning each individual has associated nuclear and mtDNA data (e.g., Zarza et al.  
97 2016). Our specific goals were to determine if UCEs are useful for addressing potential cryptic  
98 diversity within a species complex of frogs. Then, we assess whether linked mtDNA data, by  
99 providing a bridge to Genbank data, allows for more refined conclusions about the  
100 identification of any discovered lineages.

101

## 102 **Methods**

103 *Sampling and Ingroup Determination*

104 MK and PH collected tadpoles from January to June 2004 across most of the range where  
105 *Sarcohyala bistincta* are known to exist (Duellman 2001) in the Transvolcanic Belt of Michoacán,  
106 Morelos, and the state of México, the Sierra Madre del Sur of Guerrero, and the highlands of  
107 Oaxaca stretching into Puebla and Veracruz (Fig. 1; Table 1). Unsampld parts of the *S. bistincta*  
108 range include the far west Transvolcanic Belt in Michoacán and Jalisco, the far northwest in the  
109 Sierra Madre Occidental (Nayarit, Durango, and Sinaloa), and the far northeast in Hidalgo (see  
110 Fig. S1 for sampled and unsampled locations and known ranges of all *Sarcohyala* species).

111 Tadpoles were targeted to improve sampling efficiency, which allowed for a larger  
112 sampling range and sample density. After collection from a sampling location with a dip net,  
113 tadpoles were, to the extent possible, separated by species based on morphology and reared to  
114 subadults in the laboratory prior to vouchering. Species identification was based on the most  
115 recent diagnosis of *S. bistincta* and other closely related species (Duellman 2001). One tadpole  
116 was chosen for the tissue voucher, while the other individuals became physical vouchers with  
117 museum catalog numbers. Thus, we provide both field numbers and catalog numbers in Table 1  
118 to provide a link to both the exact genetic material (field number) and the associated phenotype  
119 voucher representing that genotype (museum catalog number). Before limiting our taxonomic  
120 sampling to 38 individuals in a clade thought to represent *S. bistincta* (as we discuss later, some  
121 turned out to be already-described species nested within *S. bistincta*), we ran preliminary  
122 phylogenetic analyses including broader sampling of 45 *Sarcohyala* individuals and an outgroup  
123 genus *Exerodonta* to ensure we had correctly identified the ingroup (Table S1; Fig. S2).

124

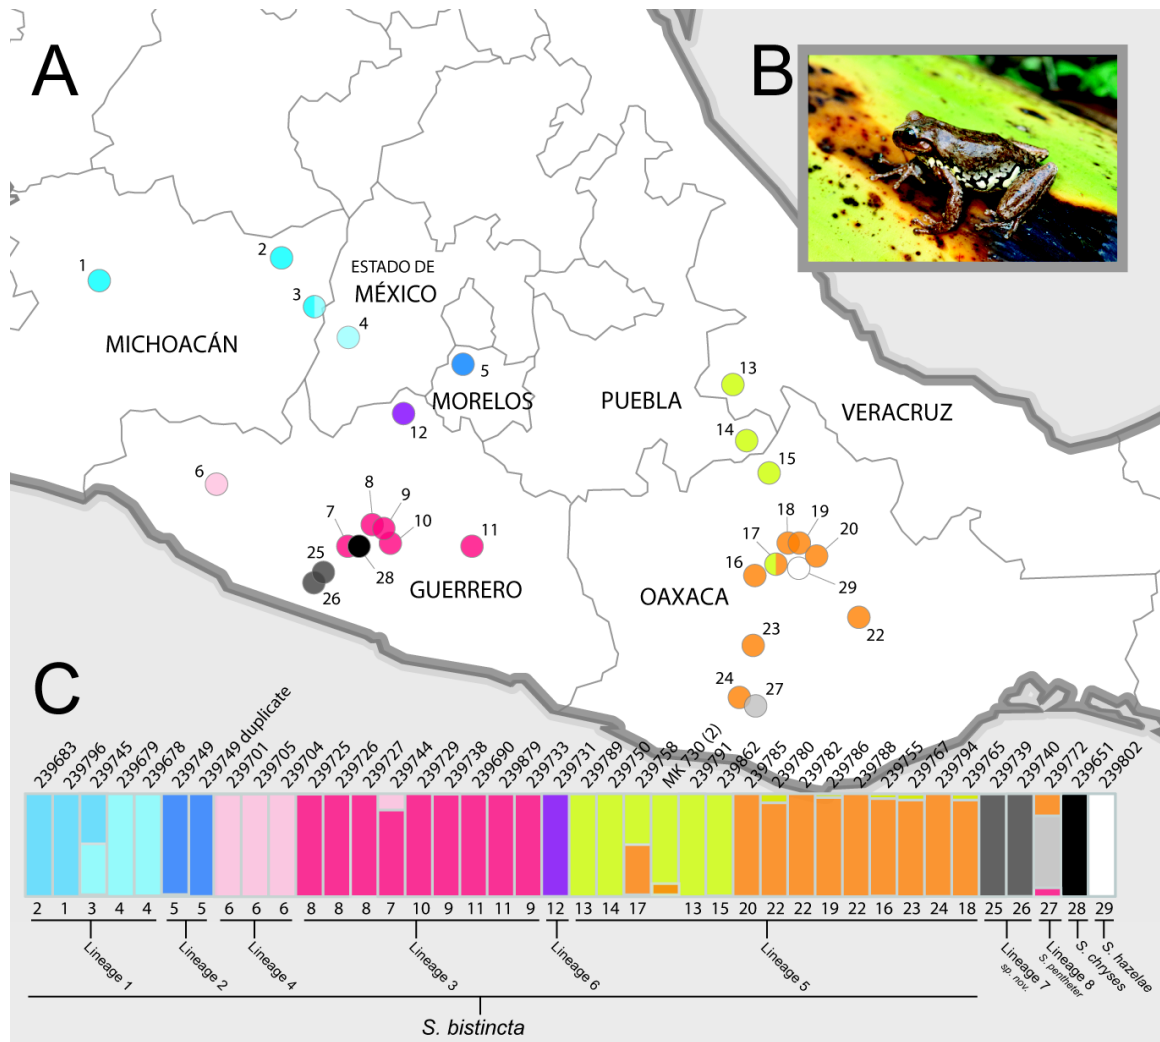

125

126

127

128

129

130

131

132

133

134

135

Figure 1. (A) Map of central Mexico showing sampling sites for *S. bistincta* and close outgroups, with numbers matching localities listed in Table 1 and colors matching Structure results below. Unsampld parts of the distribution of *S. bistincta* are shown in Fig. S1; (B) *S. bistincta* individual from near site 1; (C) Composite results of repeated Structure runs at  $K = 2$  showing the finest detectable structure in the genetic data. Each vertical line represents an individual labeled with its UMMZ catalog number above and, in descending order below, the site number and the lineage number based on the SNAPP analysis. One tissue voucher MK 730 (2) could not be linked to a specimen voucher and thus its geographic locality is unknown.

136

137 *Sequence capture and next-generation sequencing*

138 We extracted genomic DNA from tissue using a Qiagen (Valencia, CA) DNAeasy Blood and  
139 Tissue extraction kit. We visualized extractions on an agarose gel to ensure fragments were  
140 larger than 200 base pairs (bp) and quantified the resulting double-stranded DNA using a Qubit  
141 2.0 Fluorometer (Carlsbad, CA). For each sample, we sheared 100  $\mu$ l of 20 ng/ $\mu$ l concentration  
142 DNA to a size distribution with its peak between 400 and 600 bp using a Bioruptor  
143 ultrasonicator (Diagenode). We prepared libraries for each sheared sample with a KAPA  
144 (Boston, MA) LTP library preparation kit for the Illumina platform, attaching custom indexing  
145 tags (Faircloth & Glenn 2012) to each sample to allow sample pooling.

146 We enriched pools of eight samples using a set of synthetic RNA probes that target 5,060  
147 tetrapod UCEs (MYbaits\_Tetrapods-UCE-5K kit, Mycoarray) following the standard UCE  
148 enrichment protocol (Faircloth et al. 2012) with one modification. Amphibians have large and  
149 variable genome sizes with a high percentage of repetitive DNA (Olmo 1991). While we do not  
150 have information about the genome size and composition of *Sarcohya* specifically, we wanted to  
151 decrease the potential risk of the probes hybridizing to repetitive elements (McCartney-Melstad  
152 et al. 2016). We thus increased by 6X the amount of the Cot-1 blocker, a synthetic DNA derived  
153 from chicken that binds to repetitive regions. After enrichment and recovery PCR, we verified  
154 the library size range with an Agilent 2100 Bioanalyzer (Palo Alto, CA). We quantified the  
155 enriched pools using qPCR and combined them in equimolar ratios before sequencing on an  
156 Illumina HiSeq 2000 lane (100-bp paired-end cycle) at the University of California Santa Cruz  
157 Genome Technology Center.

158

159 *Bioinformatics of next-generation sequencing data*

160 We demultiplexed the Illumina raw reads and converted them to FASTQ format with the  
161 program bcl2fastq v.1.8.4 (Illumina, Inc.). To eliminate adapter contamination and low quality  
162 bases, we trimmed the FASTQC output with illumiprocessor (Faircloth 2013). We trimmed and



163 assembled these reads into contigs with Trinity (Haas et al. 2013) and ABySS (Simpson et al.  
164 2009), both of which are built into the PHYLUCE pipeline (Faircloth 2015). PHYLUCE uses  
165 LASTZ (Harris 2007) to align all assembled contigs to UCE probes in order to isolate only UCE  
166 contigs and to identify and eliminate paralogs.

167

#### 168 *Phylogenetic trees from concatenated UCE data*

169 We extracted UCE contigs into a single FASTA file and aligned the output for each locus using  
170 MAFFT (Kato et al. 2005). We required that 75% of the taxa needed to have data for a given  
171 locus to be included in the final concatenated matrix, which led to dropping loci that did not  
172 meet this threshold. We then constructed a maximum-likelihood (ML) tree in RAxML v8.0.19  
173 (Stamatakis 2014) under the GTRGAMMA model of evolution with 100 bootstrap searches,  
174 followed by a search for the tree with the highest likelihood.

175

#### 176 *Mitochondrial DNA assembly and analysis*

177 We identified and assembled mtDNA genomes from off-target, trimmed Illumina reads using  
178 the reference genome of a closely related species, *Hyla annectans* (Genbank accession number  
179 KM271781; Ye et al. 2016). We used MITObim 1.7 (Hahn et al. 2013), a Perl wrapper for MIRA  
180 4.0.2 (Chevreux et al. 1999), that takes an iterative mapping approach for assembly. We  
181 conducted *de novo* annotation of the assembled mtDNA regions with the MITOchondrial  
182 genome annotation Server, MITOS (Bernt et al. 2013). We selected for analysis only those  
183 individual genomes with MIRA quality score greater than 30. We aligned each protein-coding  
184 region separately in Geneious vR8 (Kearse et al. 2012) using MUSCLE (Edgar 2004) and  
185 corrected the alignments manually when necessary and constructed a concatenated mtDNA  
186 matrix, which we also ran in RAxML v8.0.19.

187 We melded this mtDNA data with existing *Sarcohyala* and *Plectrohyla* mtDNA data on  
188 Genbank to determine whether any of the lineages we uncovered in *S. bistincta* relate to already-

189 described species. We determined that *cytochrome b* is the best-represented mtDNA gene on  
190 Genbank for this group. We downloaded all existing *cytochrome b* sequences from *Sarcohylla* and  
191 *Plectrohyla* taxa. We combined these sequences with those from a subset of our *S. bistincta*  
192 samples, choosing the individual with the most raw reads from each major genetic lineage in  
193 the UCE tree. We aligned the trimmed, filtered reads for each individual to a *Sarcohylla*  
194 *cytochrome b* reference sequence and formed a consensus sequence for each individual from the  
195 mapped reads. We then created an alignment and generated a phylogeny using BEAST v2.4.2  
196 (Bouckaert et al. 2014). We repeated this process with 16S data because we suspected *S. pentheter*  
197 was closely related to our ingroup, but *S. pentheter* had no *cyt b* sequence on Genbank.

198

#### 199 *Calling SNPs from UCE loci*

200 We called SNPs from UCE loci so that we could run genetic clustering tests and infer a species  
201 tree using SNAPP (Bryant et al. 2012), which uses SNPs as input data. Calling SNPs requires a  
202 reference sequence, and we chose the sample with the most UCE contigs recovered within the  
203 ingroup (UMMZ 239727). We then used BWA (Li & Durbin 2009) to map the reads of each  
204 sample to this reference. We used SAMtools (Li et al. 2009) to sort the reads, and Picard  
205 (<http://broadinstitute.github.io/picard>) to identify and remove PCR duplicates. We realigned  
206 the mapped reads to minimize mismatched bases due to indels, and we removed indels using  
207 the Genome Analysis Toolkit 3.2 (GATK; McKenna et al. 2010) and a custom script  
208 (*indelrealigner.sh*), as suggested by the Best Practices workflow (DePristo et al. 2011; van der  
209 Auwera et al. 2013).

210         There is no SNP database available for treefrogs, so we followed best practices for base  
211 recalibration for non-model organisms suggested by GATK (McKenna et al. 2010). This consists  
212 of (1) doing an initial round of calling SNPs on the original, uncalibrated data, (2) selecting the  
213 SNPs with the highest confidence (a minimum emission and call quality of 40 or more), and (3)  
214 using these SNPs as the reference database of known SNPs. We executed four rounds of base  
215 recalibration on the original data to filter out systematic error using a custom script. We called

216 genotypes on the last recalibrated BAM file. We used vcf-tools (Danecek et al. 2011) to select one  
217 SNP per UCE and produce two data sets, one allowing 25% missing data for STRUCTURE v  
218 2.3.4 (Pritchard et al. 2000), and one with no missing data – a requirement for SNAPP as  
219 implemented in BEAST v2.2.1 (Bouckaert et al. 2014).

220

#### 221 *STRUCTURE analyses*

222 We used STRUCTURE v2.3.4 (Pritchard et al. 2000) as an unbiased way to assess the limits of  
223 fine-scale genetic structure in our data. Our intent with using STRUCTURE was not to  
224 determine the single most likely number of genetic clusters; thus, we did not use a method for  
225 identifying the “true  $K$ ” (Evanno et al. 2005), which can underestimate fine-scale population  
226 structure (Janes et al. 2017). Rather, our goal was to determine the maximum possible number of  
227 genetic clusters in our data (e.g., Brown et al. 2007; Gowen et al. 2014). We began by analyzing  
228 all individuals of *S. bistrincta* plus two outgroup species *S. chryses* and *S. hazelae* under  $K = 4$ ,  
229 reasoning that this would likely split out the two outgroups as well as reveal at most one  
230 division within *S. bistrincta*. After this, each identified genetic cluster within *S. bistrincta* was  
231 further analyzed at  $K = 2$  until no coherent geographically-based structure was evident in the  
232 plots. All runs were completed twice and each used an admixture model and 10M generations  
233 with 1M generations as burn-in, which led to convergence for all analyses.

234

#### 235 *SNAPP tree and species delimitation*

236 We generated a species tree from the SNP matrix using SNAPP 1.1.10 (Bryant et al. 2012). This  
237 analysis included putative *S. bistrincta* samples (again, later shown to include other species  
238 nested within) and one outgroup, *S. chryses*. For this run, we made no *a priori* assumptions  
239 about how individuals grouped into species and allowed each individual to be considered its  
240 own “species” (i.e., terminal tip). We ran two instances of SNAPP for seven million generations  
241 using default priors. We combined tree and parameter files from both runs with LogCombiner

242 2.1.3 and displayed the full set of likely species trees with Densitree v2.2.1 (Bouckaert et al.  
243 2014).

244

## 245 **Results**

### 246 *NGS summary statistics*

247 Detailed summary statistics for each of the 38 ingroup samples and two outgroups are  
248 described in Table 1. ABySS produced longer contigs than Trinity, and a higher number of UCE  
249 loci, so we used ABySS contigs in all downstream analyses. Reads per sample ranged from  
250 17,052 to 3,423,330 with an average of 1,185,165 reads. The number of identified UCEs ranged  
251 from 381 to 2,444 with an average of 1,976 UCEs. The mean length of individual UCE loci per  
252 individual ranged from 222 to 717 bp with an average of 522 bp. On average, 18% of the  
253 assembled contigs corresponded to unique UCE loci.

254 For SNP calling, across 40 samples of *S. bistrincta* and outgroups, 9% of the trimmed  
255 reads mapped to our designated reference individual. SNP read depth ranged from 2.4 to 35.0  
256 with an average depth of 21.2. The recalibration and quality control steps resulted in an initial  
257 matrix of 16,578 SNPs. After removing non-biallelic loci, selecting one SNP for every UCE, and  
258 allowing 25% missing data, there were 1,742 SNPs left in the STRUCTURE data set, while the  
259 100% complete data matrix for SNAPP contained 399 SNPs.

260

### 261 *UCE phylogeny from concatenated data*

262 Our more taxonomically inclusive data set with all available *Sarcohylla* and outgroup *Exerodonta*  
263 *xera* (Table S1) contained 1,866 UCE loci and 1,030,450 bp for a concatenated analysis. The  
264 resulting ML tree (Fig. S2) showed strong support for monophyly of *Sarcohylla*, and identified *S.*  
265 *arborescandens* and *S. cyclada* as sister species that together form a clade sister to the rest of the  
266 *Sarcohylla* included in the study. We limited further analyses to a smaller data set of 40 samples  
267 with *S. hazelae* as the outgroup (Table 1). This focal data set contained 1,891 UCE loci and  
268 1,038,600 bp.

269 The ML tree of these 40 samples found strong support for many clades within the  
270 species currently described as *S. bistincta*, conforming to distinct geographic areas (Fig. 2a).  
271

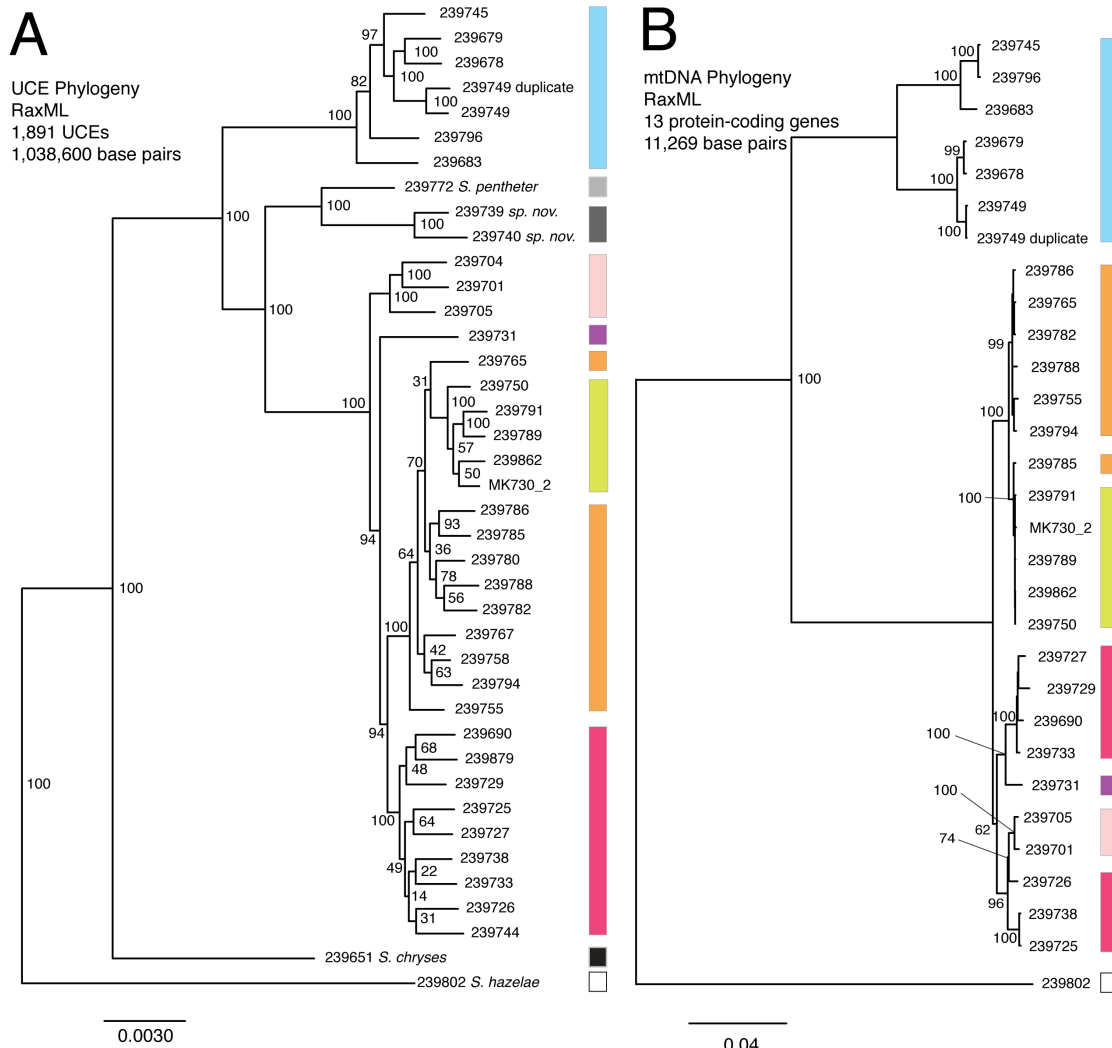

272  
273 **Figure 2. (A) UCE tree; (B) mtDNA tree. Colors match Structure groups identified in Fig. 1.**

274 **Tips are labeled with their UMMZ catalog number.**

275  
276 In brief, there were three clades on relatively long branches: (1) a clade distributed across the  
277 Transvolcanic Belt (shaded blue in figures); (2) a clade inhabiting two disjunct areas along the  
278 coastal slopes of the Sierra Madre del Sur in Guerrero and Oaxaca (shaded gray); and (3) a clade  
279 broadly distributed in the Sierra Madre del Sur (shaded red and pink), the Oaxaca Highlands

280 (shaded yellow and orange), and one individual in the southern portion of the Transvolcanic  
281 Belt (shaded purple). One individual that nested within *S. bistincta* was labeled as a different  
282 species, *S. mykter*, from Guerrero. We suspect that this sample was mislabeled and is actually a  
283 duplicate of an *S. bistincta* sample already included in the study because their field numbers are  
284 similar (last two digits transposed) and the two samples grouped together in all analyses. We  
285 have left this sample in all analyses, but have labeled it as a duplicate of *S. bistincta* UMMZ  
286 239749. Another tissue voucher, MK 730 (2), could not be linked definitively to a physical  
287 voucher, and thus its geographic location is unknown. Its tip label has been left as the field  
288 number. Connecting UCE with mtDNA data, discussed later, revealed that one specimen in the  
289 gray clade (UMMZ 239772) is an already-described species, *S. pentheter*.

290

#### 291 *mtDNA tree*

292 Our final concatenated mtDNA matrix (individual *cyt b* and 16S tree are discussed later) was  
293 11,269 base pairs including gaps, as coverage of the mtDNA genome varied from sample to  
294 sample in accordance with the non-targeted nature of the DNA collection (Table 1).  
295 Relationships in the ML tree (Fig. 2b) among the 29 individuals with high quality scores were  
296 similar to the concatenated UCE tree with two key differences, both within the broadly  
297 distributed clade in Guerrero and Oaxaca: (1) in the mtDNA tree, individuals from eastern and  
298 western Guerrero (shaded pink and red in figures) formed a clade, whereas they were more  
299 distantly related in the UCE tree; (2) in the mtDNA tree, individual UMMZ 239731 (shaded  
300 purple) was nested within the Guerrero clade instead of being sister to a much more inclusive  
301 clade, as in the UCE tree.

302

#### 303 *Structure analysis*

304 As expected, the first run of STRUCTURE at  $K = 4$  split the two outgroup species into distinct  
305 clusters and split the remaining individuals into two clusters. Further analysis of each cluster at  
306  $K = 2$  revealed ten genetic clusters in all (Fig. 1c), which are largely concordant with clades



319 **Figure 3. Cloudogram of the posterior distribution of SNAPP trees from 399 high-quality**  
320 **SNPs mined from UCE loci. Tip labels are UMMZ catalog numbers. Lineages and clades are**  
321 **discussed in text. Colors match genetic clusters from Figure 1.**

322

323 *mtDNA phylogeny combining new data with Genbank sequences*

324 Using 16S sequences, we determined that one lineage from Fig. 3 matched an *S. pentheter*  
325 sequence on Genbank. This individual (UMMZ 239772) had one of the lowest read counts of  
326 any samples and very few mtDNA reads. However, five Illumina reads mapped to 16S covering  
327 421 bp of the 681 bp reference sequence (Genbank *S. pentheter* accession number DQ055825).  
328 Over this stretch, UMMZ 239772 was identical to the *S. pentheter* reference. As a point of  
329 comparison, UMMZ 239679 (a member of the blue *S. bistincta* Lineage 1 in the Transvolcanic  
330 Belt) had 70 differences across the 681 bp (10.3% divergence). This DNA identification of  
331 UMMZ 239772 as *S. pentheter* was later confirmed by re-examining the subadult specimen.

332 After confirming UMMZ 239679 as *S. pentheter*, we generated a Bayesian tree of  
333 *cytochrome b* combining the samples from this study with Genbank sequences (Fig. 4). This tree  
334 revealed not only that *S. pentheter* was nested within the current *S. bistincta*, but so was another  
335 species not included in our sampling, *S. calthula*. The tree also helped clarify relationships  
336 outside of *S. bistincta* by supporting *S. chryses* + *S. mykter* to be sister to the *S. bistincta* + *S.*  
337 *pentheter* + *S. calthula* clade.

338





357

358 *UCEs as a universal genomic marker set for species discovery?*

359 Although it requires further study, UCEs could answer the call for an multilocus DNA marker  
360 set that satisfies criteria for both ease-of-use, universality, and genomic coverage (Coissac et al.  
361 2016). UCE probe sets are now available for many taxonomic groups (Faircloth et al. 2015;  
362 Faircloth et al. 2013; Starrett et al. 2016). They capture a discrete and replicable portion of the  
363 genome, in this case a set of around 2,000 loci in frogs (from a larger set of ~5,000 vertebrate  
364 loci) that query approximately 1,000,000 base pairs, or 0.02% of the frog genome. The replicable  
365 nature of UCEs sets them apart from other types of genomic markers, like RAD loci, which can  
366 vary from experiment to experiment (DaCosta & Sorenson 2014) and find fewer orthologs with  
367 increasing phylogenetic distance (Cruaud et al. 2014). Other alternatives to UCEs exist, like  
368 exons, but in mammals exons had fewer loci conserved over broad taxonomic scales than UCEs,  
369 making them less able to be universally applied (McCormack et al. 2012). A recent study  
370 successfully applied UCEs in conjunction with species delimitation methods to two frog genera,  
371 *Melanophryniscus* and *Brachycephalus* (Pie et al. 2017). As more studies are conducted, one future  
372 research avenue would be determine how much locus-sharing occurs among studies, and  
373 whether objective benchmarks for species-level divergence can be identified.

374

375 *Implications for species limits within *Sarcohyala bistincta**

376 The monophyletic group containing *Sarcohyala bistincta* is comprised of many distinct lineages as  
377 well as two already-described species (*S. pentheter* and *S. calthula*). These lineages are grouped  
378 into three fairly divergent clades, which agree with clades uncovered in a recent study based on  
379 fewer markers (Caviedes-Solis & Nieto-Montes 2017). In discussing these clades and lineages  
380 below, we use the most conservative estimate of 8 lineages, supported by the species tree, as a  
381 framework. Within that framework, we discuss the potential for further genetic structuring, as  
382 suggested by genetic clustering results and individual UCE and mtDNA phylogenies. We do  
383 not attempt to estimate the “true” number of species through species delimitation or other

384 methods, because we feel species delimitation is best carried out through integrative taxonomy  
385 (Will et al. 2005), including at minimum analysis of the phenotype.

386

387 **Clade 1** – Transvolcanic Belt of central Mexico. This clade is sister to the rest of *S. bistincta* plus  
388 two other species, *S. pentheter* and *S. calthula*, and is 10% divergent in mtDNA from  
389 other *S. bistincta*, making it an obvious candidate for species status. This clade might  
390 itself contain multiple species in the form of the lineages below. Unsampled  
391 populations of *S. bistincta* in the Sierra Madre Occidental (Fig. S1) are very likely  
392 related to Lineage 1 of this clade, but should be included in future studies, as they  
393 might be distinctive.

394 Lineage 1 (light blue in Fig. 1) – Michoacán to western Mexico state. The Structure results  
395 show fine-scale genetic structure across this range, and the presence of a geographic  
396 and genetic intermediate hints at continuity of gene flow along the distribution  
397 from sites 1 to 4 in Figure 1. In addition to unsampled populations mentioned  
398 above, some populations in far western Michoacán (Fig. S1) are also unsampled and  
399 could reveal further genetic structure.

400 Lineage 2 (dark blue in Fig. 1) – Morelos. Denser sampling between sites 4 and 5 could  
401 help determine whether the genetic distinctness of this individual in the mtDNA  
402 and UCE trees is a true discontinuity or the result of a sampling gap.

403 **Clade 2** – Guerrero to Puebla and Veracruz and south through Oaxaca. This clade was also  
404 found to be distinct in a recent study (Caviedes-Solis & Nieto-Montes 2017) and  
405 forms the core *S. bistincta* (*sensu stricto*).

406 Lineage 3 (red in Fig. 1) – Central and eastern Guerrero. Members of this lineage are  
407 distinct from Lineage 4 and are monophyletic in the UCE-based trees (though not in  
408 the mtDNA tree). Further sampling in between site 6 and site 7 would clarify  
409 whether the genetic discontinuity between Lineages 3 and 4 results from a sampling  
410 gap.

411 Lineage 4 (pink in Fig. 1) – Western Guerrero. This lineage is monophyletic in all trees,  
412 although only a few individuals were sampled from a single locality.

413 Lineage 5 (orange and yellow in Fig. 1) – Puebla, Veracruz, and Oaxaca. This lineage  
414 contains the type locality for *S. bistincta*. Central and southern Oaxaca individuals  
415 (orange) are genetically distinct from individuals to the north (yellow). One genetic  
416 intermediate in central Oaxaca suggests genetic continuity across this range. An  
417 unsampled northern population in Hidalgo is most likely related to this lineage,  
418 and should be included in future studies.

419 Lineage 6 (purple in Fig. 1) – far northern Guerrero. This lineage is distinct but  
420 represented by only a single individual. However, in the mtDNA tree, this  
421 individual is nested within Lineages 4 and 5 above. Sampling more individuals is  
422 needed to determine how distinct this lineage might be.

423 **Clade 3** – Pacific slope of Guerrero and Oaxaca. This clade contains two species: one already  
424 described (*S. pentheter*) and one currently being described (*sp. nov.*; Kaplan et al. in  
425 prep). The relationship of *S. calthula* to this clade is unclear in our results, as  
426 bootstrap support was low in the combined mtDNA tree (Fig. 4). Caviedes-Solis et  
427 al. (2017) placed *S. calthula* sister to *S. pentheter* based on five genes. Thus *S. calthula*  
428 is likely also a member of Clade 3.

429 Lineage 7 (dark gray in Fig. 1) – Pacific slope of Guerrero. This lineage was being  
430 described as a new species (we call it *sp. nov.*) on the basis of phenotypic differences  
431 before this genetic study was begun (Kaplan et al. in prep). Thus, our study lends  
432 support to species status for this lineage.

433 Lineage 8 (light gray in Fig. 1) – *S. pentheter*. Pacific slope of Oaxaca.

434

435 The three clades and nearly all of the lineages were distinct in the mtDNA tree as well as the  
436 UCE tree (Fig. 2). The mtDNA tree, however, supports a more complicated history for Lineages  
437 3, 4, and 6 in Guerrero. It is unclear why UCE and mtDNA results differed in this regard, but

438 some reticulate processes might have influenced the mtDNA genomes of these lineages,  
439 perhaps, given their close geographic proximity, mtDNA capture of one lineage by another  
440 through gene flow (e.g., Bryson Jr et al. 2010).

441 Additional insights into broader *Sarcohylla* relationships offered by the mtDNA tree  
442 include support for a previously hypothesized close relationship between *S. hazelae* and *S.*  
443 *thorectes* (Caviedes-Solis & Nieto-Montes 2017; Faivovich et al. 2009), and a sister relationship  
444 between *S. mykter* and *S. chryses* (also found by Caviedes-Solis et al. (2017)). As *Sarcohylla* is very  
445 poorly represented by voucher specimens and DNA sequences (Fig. S1), a complete  
446 understanding of the history of this genus must await more complete taxonomic and genomic  
447 sampling. Unfortunately, there appear to be some microendemic *Sarcohylla* that might have  
448 already gone extinct (Lips et al. 2004), especially in the Oaxacan highlands, although recent  
449 resurveys provide hope for rediscoveries (Delia et al. 2013).

450 This and other recent studies show there is still substantial diversity remaining to be  
451 described in the Mexican Highlands. Genetic studies to uncover this diversity might use  
452 different approaches and marker types, but these efforts need not be in opposition. As our  
453 study shows, NGS and mtDNA data work well together, when lineages uncovered via  
454 multilocus methods (but with linked mtDNA data) can be checked against and combined with  
455 existing mtDNA databases like Genbank. Identification of vouchered material might not be a  
456 problem with some well-studied groups, like birds, but it is invaluable for groups with  
457 undescribed larval stages, unclear range boundaries, and difficult or highly conserved  
458 phenotypes. As the destruction of native habitats continues apace, it is important that we  
459 identify distinctive lineages and geographic centers of diversity before they are lost.

460

#### 461 **List of abbreviations**

462 **UCEs:** ultraconserved elements    **SNPs:** single nucleotide polymorphisms    **mtDNA:**  
463 mitochondrial DNA    **bp:** base pairs    **ML:** maximum-likelihood    **UMMZ:** University of Michigan  
464 Museum of Zoology    **RAD loci:** restriction digest-associated loci

465

466 **Declarations**

467

468 **Ethics approval and consent to participate**

469 This study complied with standard ethical guidelines for the rearing and collection of tadpoles.

470

471 **Consent for publication**

472 Not applicable.

473

474 **Availability of data and materials**

475 The datasets generated and analyzed in the current study will be made available on Genbank  
476 (BioProject ID PRJNA393258) and Dryad upon publication.

477

478 **Competing Interests**

479 The authors declare that they have no competing interests.

480

481 **Funding**

482 The project was partially funded by National Science Foundation grant DEB-1258205 to JM.

483

484 **Authors' contributions**

485 MK and PH collected samples in the field; MK and JEM designed the study; EZ and WLET  
486 produced the genomic data; EZ, EMC, and JMM analyzed the data; JEM and EZ wrote the  
487 manuscript; JEM created the figures; All authors read and approved the final manuscript.

488

489 **Acknowledgments**

490 We thank Greg Schneider and Ron Nussbaum at UMMZ for providing access to tissue samples  
491 and vouchers, and Oscar Flores for help with permits.

492

493 **Literature Cited**

- 494 Bernt M, Donath A, Jühling F, Externbrink F, Florentz C, Fritsch G, Pütz J, Middendorf M, and  
495 Stadler PF. 2013. MITOS: Improved de novo metazoan mitochondrial genome  
496 annotation. *Molecular Phylogenetics and Evolution* 69:313-319.
- 497 Bouckaert R, Heled J, Kühnert D, Vaughan T, Wu C-H, Xie D, Suchard MA, Rambaut A, and  
498 Drummond AJ. 2014. BEAST 2: a software platform for Bayesian evolutionary analysis.  
499 *PLoS Computational Biology* 10:e1003537.
- 500 Brown DM, Brenneman RA, Koepfli K-P, Pollinger JP, Milá B, Georgiadis NJ, Louis EE, Grether  
501 GF, Jacobs DK, and Wayne RK. 2007. Extensive population genetic structure in the  
502 giraffe. *BMC biology* 5:57.
- 503 Bryant D, Bouckaert R, Felsenstein J, Rosenberg NA, and RoyChoudhury A. 2012. Inferring  
504 species trees directly from biallelic genetic markers: bypassing gene trees in a full  
505 coalescent analysis. *Molecular Biology and Evolution* 29:1917-1932.
- 506 Bryson Jr RW, De Oca ANM, Jaeger JR, and Riddle BR. 2010. Elucidation of cryptic diversity in  
507 a widespread Nearctic treefrog reveals episodes of mitochondrial gene capture as frogs  
508 diversified across a dynamic landscape. *Evolution* 64:2315-2330.
- 509 Bryson RW, De Oca ANM, Jaeger JR, and Riddle BR. 2010. Elucidation of cryptic diversity in a  
510 widespread Nearctic treefrog reveals episodes of mitochondrial gene capture as frogs  
511 diversified across a dynamic landscape. *Evolution* 64:2315-2330.
- 512 Bryson RW, García-Vázquez UO, and Riddle BR. 2012. Diversification in the Mexican horned  
513 lizard *Phrynosoma orbiculare* across a dynamic landscape. *Molecular Phylogenetics and*  
514 *Evolution* 62:87-96.
- 515 Bryson RW, Murphy RW, Lathrop A, and Lazcano-Villareal D. 2011. Evolutionary drivers of  
516 phylogeographical diversity in the highlands of Mexico: a case study of the *Crotalus*  
517 *triseriatus* species group of montane rattlesnakes. *Journal of Biogeography* 38:697-710.
- 518 Campbell JA, Blancas-Hernández JC, and Smith EN. 2009. A new species of stream-breeding  
519 treefrog of the genus *Charadrahyla* (Hylidae) from the Sierra Madre del Sur of Guerrero,  
520 Mexico. *Copeia* 2009:287-295.
- 521 Caviedes-Solis I, and Nieto-Montes dOA. 2017. A multilocus phylogeny of the genus *Sarcohyla*  
522 (Anura: Hylidae), and an investigation of species boundaries using statistical species  
523 delimitation. *Molecular Phylogenetics and Evolution* 118:184-193.

- 524 Chevreaux B, Wetter T, and Suhai S. 1999. Genome sequence assembly using trace signals and  
525 additional sequence information. *Computer Science and Biology: Proceedings of the German*  
526 *Conference on Bioinformatics* 99:45-56.
- 527 Coissac E, Hollingsworth PM, Lavergne S, and Taberlet P. 2016. From barcodes to genomes:  
528 extending the concept of DNA barcoding. *Molecular ecology* 25:1423-1428.
- 529 Crawford NG, Faircloth BC, McCormack JE, Brumfield RT, Winker K, and Glenn TC. 2012.  
530 More than 1000 ultraconserved elements provide evidence that turtles are the sister  
531 group of archosaurs. *Biology Letters* 8:783-786. 10.1098/rsbl.2012.0331
- 532 Cruaud A, Gautier M, Galan M, Foucaud J, Sauné L, Genson G, Dubois E, Nidelet S, Deuve T,  
533 and Rasplus J-Y. 2014. Empirical assessment of RAD sequencing for interspecific  
534 phylogeny. *Molecular Biology and Evolution* 31:1272-1274.
- 535 DaCosta JM, and Sorenson MD. 2014. Amplification biases and consistent recovery of loci in a  
536 double-digest RAD-seq protocol. *PloS one* 9:e106713.
- 537 Danecek P, Auton A, Abecasis G, Albers CA, Banks E, DePristo MA, Handsaker RE, Lunter G,  
538 Marth GT, and Sherry ST. 2011. The variant call format and VCFtools. *Bioinformatics*  
539 27:2156-2158.
- 540 Delia JR, Whitney JL, and Burkhardt T. 2013. Rediscovery of 'lost' treefrogs from the Oaxacan  
541 highlands of Mexico. *Biodiversity and conservation* 22:1405-1414.
- 542 DePristo MA, Banks E, Poplin R, Garimella KV, Maguire JR, Hartl C, Philippakis AA, Del Angel  
543 G, Rivas MA, and Hanna M. 2011. A framework for variation discovery and genotyping  
544 using next-generation DNA sequencing data. *Nature genetics* 43:491-498.
- 545 do Amaral FR, Neves LG, Resende Jr MF, Mobili F, Miyaki CY, Pellegrino KC, and Biondo C.  
546 2015. Ultraconserved elements sequencing as a low-cost source of complete  
547 mitochondrial genomes and microsatellite markers in non-model amniotes. *PloS one*  
548 10:e0138446.
- 549 Duellman WE. 2001. *Hylid frogs of Middle America*. Ithaca, New York: Society for the Study of  
550 Amphibians and Reptiles.
- 551 Duellman WE, Marion AB, and Hedges SB. 2016. Phylogenetics, classification, and  
552 biogeography of the treefrogs (Amphibia: Anura: Arboranae). *Zootaxa* 4104:1-109.
- 553 Edgar RC. 2004. MUSCLE: multiple sequence alignment with high accuracy and high  
554 throughput. *Nucleic acids research* 32:1792-1797.
- 555 Edwards S, and Bensch S. 2009. Looking forwards or looking backwards in avian  
556 phylogeography? A comment on. *Molecular ecology* 18:2930-2933.
- 557 Edwards SV. 2009. Is a new and general theory of molecular systematics emerging? *Evolution*  
558 63:1-19.



- 559 Evanno G, Regnaut S, and Goudet J. 2005. Detecting the number of clusters of individuals using  
560 the software STRUCTURE: a simulation study. *Molecular ecology* 14:2611-2620.
- 561 Faircloth BC. 2013. illumiprocessor: a trimmomatic wrapper for parallel adapter and quality  
562 trimming. <https://github.com/faircloth-lab/illumiprocessor/>.
- 563 Faircloth BC. 2015. PHYLUCe is a software package for the analysis of conserved genomic loci.  
564 *Bioinformatics* 32:786-788.
- 565 Faircloth BC, Branstetter MG, White ND, and Brady SG. 2015. Target enrichment of  
566 ultraconserved elements from arthropods provides a genomic perspective on  
567 relationships among Hymenoptera. *Molecular Ecology Resources* 15:489-501.
- 568 Faircloth BC, and Glenn TC. 2012. Not all sequence tags are created equal: designing and  
569 validating sequence identification tags robust to indels. *PloS one* 7:e42543.
- 570 Faircloth BC, McCormack JE, Crawford NG, Harvey MG, Brumfield RT, and Glenn TC. 2012.  
571 Ultraconserved elements anchor thousands of genetic markers spanning multiple  
572 evolutionary timescales. *Systematic Biology* 61:717-726. 10.1093/sysbio/sys004
- 573 Faircloth BC, Sorenson L, Santini F, and Alfaro ME. 2013. A phylogenomic perspective on the  
574 radiation of ray-finned fishes based upon targeted sequencing of ultraconserved  
575 elements (UCEs). *PloS one* 8:e65923.
- 576 Faivovich J, Haddad CF, Garcia PC, Frost DR, Campbell JA, and Wheeler WC. 2009. Systematic  
577 review of the frog family Hylidae, with special reference to Hylinae: phylogenetic  
578 analysis and taxonomic revision. *Bulletin of the American Museum of Natural History* 294:1-  
579 240.
- 580 Fujita MK, Leaché AD, Burbrink FT, McGuire JA, and Moritz C. 2012. Coalescent-based species  
581 delimitation in an integrative taxonomy. *Trends in Ecology & Evolution* 27:480-488.
- 582 Gowen FC, Maley JM, Cicero C, Peterson AT, Faircloth BC, Warr TC, and McCormack JE. 2014.  
583 Speciation in Western Scrub-Jays, Haldane's rule, and genetic clines in secondary  
584 contact. *BMC evolutionary biology* 14:135.
- 585 Haas BJ, Papanicolaou A, Yassour M, Grabherr M, Blood PD, Bowden J, Couger MB, Eccles D,  
586 Li B, and Lieber M. 2013. De novo transcript sequence reconstruction from RNA-seq  
587 using the Trinity platform for reference generation and analysis. *Nature protocols* 8:1494-  
588 1512.
- 589 Hahn C, Bachmann L, and Chevreaux B. 2013. Reconstructing mitochondrial genomes directly  
590 from genomic next-generation sequencing reads—a baiting and iterative mapping  
591 approach. *Nucleic acids research* 41:e129.
- 592 Harris RS. 2007. *Improved pairwise alignment of genomic DNA*. PhD Thesis: Pennsylvania State  
593 University.

- 594 Janes JK, Miller JM, Dupuis JR, Malenfant RM, Gorrell JC, Cullingham CI, and Andrew RL.  
595 2017. The K= 2 conundrum. *Molecular ecology* 14:3594–3602.
- 596 Kearse M, Moir R, Wilson A, Stones-Havas S, Cheung M, Sturrock S, Buxton S, Cooper A,  
597 Markowitz S, and Duran C. 2012. Geneious Basic: an integrated and extendable desktop  
598 software platform for the organization and analysis of sequence data. *Bioinformatics*  
599 28:1647-1649.
- 600 Li H, and Durbin R. 2009. Fast and accurate short read alignment with Burrows–Wheeler  
601 transform. *Bioinformatics* 25:1754-1760.
- 602 Li H, Handsaker B, Wysoker A, Fennell T, Ruan J, Homer N, Marth G, Abecasis G, and Durbin  
603 R. 2009. The sequence alignment/ map format and SAMtools. *Bioinformatics* 25:2078-2079.
- 604 Lips KR, Mendelson Iii JR, Munoz-Alonso A, Canseco-Márquez L, and Mulcahy DG. 2004.  
605 Amphibian population declines in montane southern Mexico: resurveys of historical  
606 localities. *Biological Conservation* 119:555-564.
- 607 McCartney-Melstad E, Mount GG, and Shaffer HB. 2016. Exon capture optimization in  
608 amphibians with large genomes. *Molecular Ecology Resources* 16:1084-1094.
- 609 McCormack J, Tsai WLE, and Faircloth BC. 2016. Sequence capture of ultraconserved elements  
610 from bird museum specimens. *Molecular Ecology Resources* 16:1189-1203.
- 611 McCormack JE, Faircloth BC, Crawford NG, Gowaty PA, Brumfield RT, and Glenn TC. 2012.  
612 Ultraconserved elements are novel phylogenomic markers that resolve placental  
613 mammal phylogeny when combined with species-tree analysis. *Genome Research* 22:746-  
614 754. 10.1101/gr.125864.111
- 615 McCormack JE, Peterson A, Bonaccorso E, and Smith TB. 2008. Speciation in the highlands of  
616 Mexico: genetic and phenotypic divergence in the Mexican jay (*Aphelocoma ultramarina*).  
617 *Molecular ecology* 17:2505-2521.
- 618 McKenna A, Hanna M, Banks E, Sivachenko A, Cibulskis K, Kernytzky A, Garimella K,  
619 Altshuler D, Gabriel S, and Daly M. 2010. The Genome Analysis Toolkit: a MapReduce  
620 framework for analyzing next-generation DNA sequencing data. *Genome Research*  
621 20:1297-1303.
- 622 Meik JM, Smith EN, Canseco-Márquez L, and Campbell JA. 2006. New species of the  
623 *Plectrohyla bistincta* group (Hylidae: Hylinae: Hylini) from Oaxaca, Mexico. *Journal of*  
624 *Herpetology* 40:304-309.
- 625 Moritz C, and Cicero C. 2004. DNA barcoding: promise and pitfalls. *PLoS Biology* 2:e354.
- 626 Myers N, Mittermeier RA, Mittermeier CG, Da Fonseca GA, and Kent J. 2000. Biodiversity  
627 hotspots for conservation priorities. *Nature* 403:853-858.
- 628 Olmo E. 1991. Genome variations in the transition from amphibians to reptiles. *J Mol Evol* 33:68-  
629 75.

- 630 Parra-Olea G, Flores-Villela O, and Mendoza-Almeralla C. 2014. Biodiversidad de anfibios en  
631 México. *Revista mexicana de biodiversidad* 85:460-466.
- 632 Pie MR, Bornschein MR, Ribiero LF, Faircloth BC, and McCormack JE. 2017. Phylogenomic  
633 species delimitation in microendemic frogs Of the Brazilian Atlantic forest. *bioRxiv*:doi:  
634 <https://doi.org/10.1101/143735>.
- 635 Ponce-Reyes R, Reynoso-Rosales V-H, Watson JE, VanDerWal J, Fuller RA, Pressey RL, and  
636 Possingham HP. 2012. Vulnerability of cloud forest reserves in Mexico to climate  
637 change. *Nature Climate Change* 2:448.
- 638 Pritchard JK, Stephens M, and Donnelly P. 2000. Inference of population structure using  
639 multilocus genotype data. *Genetics* 155:945-959.
- 640 Rovito SM, Parra-Olea G, Recuero E, and Wake DB. 2015. Diversification and biogeographical  
641 history of Neotropical plethodontid salamanders. *Zoological Journal of the Linnean Society*  
642 175:167-188.
- 643 Simpson JT, Wong K, Jackman SD, Schein JE, Jones SJ, and Birol I. 2009. ABySS: a parallel  
644 assembler for short read sequence data. *Genome Research* 19:1117-1123.
- 645 Smith BT, Harvey MG, Faircloth BC, Glenn TC, and Brumfield RT. 2014. Target capture and  
646 massively parallel sequencing of ultraconserved elements for comparative studies at  
647 shallow evolutionary time scales. *Systematic Biology* 63:83-95.
- 648 Stamatakis A. 2014. RAxML version 8: a tool for phylogenetic analysis and post-analysis of large  
649 phylogenies. *Bioinformatics* 30:1312-1313.
- 650 Starrett J, Derkarabetian S, Hedin M, Bryson RW, McCormack JE, and Faircloth BC. 2016. High  
651 phylogenetic utility of an ultraconserved element probe set designed for Arachnida.  
652 *Molecular Ecology Resources* 17:812-823.
- 653 Stuart SN, Hoffmann M, Chanson J, Cox N, Berridge R, Ramani P, and Young B. 2008.  
654 *Threatened amphibians of the world*. Barcelona, Spain: Lynx Edicions.
- 655 van der Auwera GA, Carneiro MO, Hartl C, Poplin R, del Angel G, Levy-Moonshine A, Jordan  
656 T, Shakir K, Roazen D, and Thibault J. 2013. From FastQ data to high-confidence variant  
657 calls: the genome analysis toolkit best practices pipeline. *Current protocols in*  
658 *bioinformatics* 11: 11.10:11.10. 11-11.10. 33.
- 659 Will KW, Mishler BD, and Wheeler QD. 2005. The perils of DNA barcoding and the need for  
660 integrative taxonomy. *Systematic Biology* 54:844-851.
- 661 Ye L, Zhu C, Yu D, Zhang Y, and Zhang J. 2016. The complete mitochondrial genome of *Hyla*  
662 *annectans* (Anura: Hylidae). *Mitochondrial DNA Part A* 27:1593-1594.

663 Zarza E, Faircloth BC, Tsai WL, Bryson RW, Klicka J, and McCormack JE. 2016. Hidden histories  
664 of gene flow in highland birds revealed with genomic markers. *Molecular ecology*  
665 25:5144-5157.

666 Zink RM, and Barrowclough GF. 2008. Mitochondrial DNA under siege in avian  
667 phylogeography. *Molecular ecology* 17:2107-2121.

668

669

670 **Tables**

671

672 Table 1. Specimen information and summary statistics for *Sarcohyla bistincta* and closely related  
673 species.

674

| Map Number <sup>1</sup> | Field Number <sup>2</sup> | Catalog Number <sup>3</sup> | Current Taxonomy    | State     | Latitude | Longitude | Trimmed Paired Reads | UCEs  | Average UCE Length | SNP Read Depth | mtDNA Reads | mtDNA Average Coverage | mtDNA Average Quality |
|-------------------------|---------------------------|-----------------------------|---------------------|-----------|----------|-----------|----------------------|-------|--------------------|----------------|-------------|------------------------|-----------------------|
| 1                       | MK 618                    | UMMZ 239796                 | <i>S. bistincta</i> | MICHOACAN | 19.7911  | -100.6605 | 1,889,670            | 2,323 | 529.7              | 31.8           | 3,381       | 20.8                   | 86                    |
| 2                       | MK 627-31                 | UMMZ 239683                 | <i>S. bistincta</i> | MICHOACAN | 19.4266  | -102.0736 | 1,933,019            | 2,254 | 370.9              | 21.6           | 3,415       | 20.8                   | 85                    |
| 3                       | MK 666                    | UMMZ 239745                 | <i>S. bistincta</i> | MICHOACAN | 19.3452  | -100.3128 | 2,186,871            | 2,350 | 621.3              | 33.9           | 3,900       | 23.4                   | 83                    |
| 4                       | MK 600                    | UMMZ 239679                 | <i>S. bistincta</i> | MEXICO    | 19.1501  | -100.1469 | 932,448              | 2,174 | 500.8              | 24.4           | 2,377       | 15.7                   | 83                    |
| 4                       | MK 600 (1)                | UMMZ 239678                 | <i>S. bistincta</i> | MEXICO    | 19.1501  | -100.1469 | 1,217,987            | 2,267 | 532.8              | 21.9           | 2,570       | 16.4                   | 84                    |
| 5                       | MK 645                    | UMMZ 239749                 | <i>S. bistincta</i> | MORELOS   | 18.9224  | -99.2442  | 2,217,054            | 2,406 | 532.5              | 34.2           | 3,494       | 21.8                   | 86                    |
| 5                       | MK 645 dupl               | UMMZ 239749                 | <i>S. bistincta</i> | MORELOS   | 18.9224  | -99.2442  | 548,545              | 1,964 | 513.0              | 17.7           | 841         | 7.4                    | 60                    |
| 6                       | MK 759                    | UMMZ 239701                 | <i>S. bistincta</i> | GUERRERO  | 18.0013  | -101.1716 | 1,224,835            | 2,199 | 557.6              | 25.0           | 2,522       | 16.2                   | 84                    |
| 6                       | MK 760                    | UMMZ 239705                 | <i>S. bistincta</i> | GUERRERO  | 18.0013  | -101.1716 | 1,074,315            | 2,203 | 559.4              | 24.3           | 743         | 6.9                    | 58                    |
| 6                       | MK 760 (2)                | UMMZ 239704                 | <i>S. bistincta</i> | GUERRERO  | 18.0013  | -101.1716 | 927,774              | 2,246 | 579.2              | 26.3           | 906         | 9.4                    | 6                     |
| 7                       | MK 691 (5)                | UMMZ 239744                 | <i>S. bistincta</i> | GUERRERO  | 17.5324  | -99.8994  | 2,084,203            | 2,353 | 672.5              | 27.2           | 1,678       | 11.9                   | 80                    |
| 8                       | MK 650 (1)                | UMMZ 239725                 | <i>S. bistincta</i> | GUERRERO  | 17.6843  | -99.8034  | 941,101              | 2,124 | 556.6              | 22.6           | 1,278       | 9.7                    | 74                    |
| 8                       | MK 650 (2)                | UMMZ 239726                 | <i>S. bistincta</i> | GUERRERO  | 17.6843  | -99.8034  | 2,224,898            | 2,394 | 506.4              | 28.4           | 1,737       | 12.2                   | 79                    |
| 8                       | MK 652                    | UMMZ 239727                 | <i>S. bistincta</i> | GUERRERO  | 17.6843  | -99.8034  | 3,423,330            | 2,444 | 526.0              | 29.8           | 1,396       | 10.4                   | 74                    |
| 9                       | MK 671 (4)                | UMMZ 239733                 | <i>S. bistincta</i> | GUERRERO  | 17.6407  | -99.6797  | 1,012,300            | 2,107 | 557.0              | 22.5           | 842         | 7.4                    | 62                    |
| 9                       | MK 672                    | UMMZ 239738                 | <i>S. bistincta</i> | GUERRERO  | 17.6407  | -99.6797  | 297,782              | 1,667 | 439.8              | 11.9           | 400         | 5.1                    | 41                    |
| 10                      | MK 656 (1)                | UMMZ 239729                 | <i>S. bistincta</i> | GUERRERO  | 17.5526  | -99.6626  | 580,194              | 1,950 | 497.6              | 18.4           | 547         | 5.9                    | 42                    |
| 11                      | MK 674 (1)                | UMMZ 239690                 | <i>S. bistincta</i> | GUERRERO  | 17.5087  | -99.1258  | 659,418              | 1,941 | 565.4              | 18.8           | 1,086       | 8.7                    | 68                    |
| 11                      | MK 675 (2)                | UMMZ 239879                 | <i>S. bistincta</i> | GUERRERO  | 17.5087  | -99.1258  | 336,474              | 1,565 | 519.1              | 10.4           | 227         | 4.2                    | 24                    |
| 12                      | MK 662                    | UMMZ 239731                 | <i>S. bistincta</i> | GUERRERO  | 18.6359  | -99.6491  | 1,137,742            | 2,130 | 548.7              | 23.5           | 906         | 7.2                    | 56                    |
| 13                      | MK 697 (3)                | UMMZ 239789                 | <i>S. bistincta</i> | VERACRUZ  | 18.6585  | -97.1574  | 1,524,182            | 2,214 | 625.6              | 24.3           | 2,479       | 16.0                   | 82                    |
| 13                      | MK 699 (1)                | UMMZ 239791                 | <i>S. bistincta</i> | VERACRUZ  | 18.6477  | -97.1574  | 1,342,010            | 2,206 | 610.9              | 24.4           | 1,769       | 12.3                   | 79                    |
| 14                      | MK 700 (2)                | UMMZ 239750                 | <i>S. bistincta</i> | PUEBLA    | 18.3220  | -97.0285  | 2,203,360            | 2,298 | 697.8              | 27.6           | 4,155       | 24.8                   | 86                    |
| 15                      | MK 705 (1)                | UMMZ 239862                 | <i>S. bistincta</i> | OAXACA    | 18.1576  | -96.8684  | 2,529,703            | 2,417 | 644.6              | 30.3           | 3,164       | 19.6                   | 85                    |
| 16                      | MK 715                    | UMMZ 239755                 | <i>S. bistincta</i> | OAXACA    | 17.2390  | -97.0032  | 347,152              | 1,712 | 437.7              | 12.1           | 254         | 4.3                    | 31                    |
| 17                      | MK 716 (1)                | UMMZ 239758                 | <i>S. bistincta</i> | OAXACA    | 17.3036  | -96.7930  | 52,461               | 594   | 267.4              | 2.7            | 8           | 3.0                    | 1                     |
| 18                      | MK 718 (2)                | UMMZ 239765                 | <i>S. bistincta</i> | OAXACA    | 17.4211  | -96.6876  | 606,978              | 2,014 | 568.6              | 19.7           | 366         | 4.9                    | 37                    |
| 19                      | MK 755 (1)                | UMMZ 239786                 | <i>S. bistincta</i> | OAXACA    | 17.4153  | -96.5671  | 871,034              | 2,062 | 563.2              | 22.0           | 1,022       | 8.4                    | 69                    |
| 20                      | MK 751                    | UMMZ 239785                 | <i>S. bistincta</i> | OAXACA    | 17.3160  | -96.4435  | 1,577,190            | 2,342 | 621.5              | 28.5           | 2,376       | 15.4                   | 84                    |
| 22                      | MK 748 (2)                | UMMZ 239780                 | <i>S. bistincta</i> | OAXACA    | 16.9791  | -96.1364  | 91,912               | 1,009 | 302.5              | 4.2            | 23          | 3.1                    | 3                     |
| 22                      | MK 748 (4)                | UMMZ 239782                 | <i>S. bistincta</i> | OAXACA    | 16.9791  | -96.1364  | 1,058,426            | 2,170 | 553.8              | 23.7           | 499         | 5.7                    | 42                    |
| 22                      | MK 767                    | UMMZ 239788                 | <i>S. bistincta</i> | OAXACA    | 16.9859  | -96.1358  | 1,083,058            | 2,206 | 524.7              | 24.3           | 617         | 6.3                    | 52                    |
| 23                      | MK 721                    | UMMZ 239767                 | <i>S. bistincta</i> | OAXACA    | 16.7377  | -97.0384  | 146,471              | 1,215 | 376.0              | 6.1            | 62          | 3.3                    | 10                    |
| 24                      | MK 766                    | UMMZ 239794                 | <i>S. bistincta</i> | OAXACA    | 16.2522  | -97.1536  | 994,521              | 2,166 | 577.4              | 23.3           | 467         | 5.5                    | 43                    |
|                         | MK 730 (2)                | ?                           | <i>P. bistincta</i> | ?         | ?        | ?         | 2,967,630            | 2,404 | 716.9              | 31.1           | 3,581       | 21.7                   | 84                    |
| 25                      | MK 685 (2)                | UMMZ 239739                 | <i>S. sp. nov.</i>  | GUERRERO  | 17.3812  | -100.2009 | 269,729              | 1,645 | 450.6              | 10.8           | 184         | 4.0                    | 20                    |
| 26                      | MK 689 (2)                | UMMZ 239740                 | <i>S. sp. nov.</i>  | GUERRERO  | 17.3000  | -100.2792 | 67,313               | 502   | 221.6              | 2.6            | 32          | 3.1                    | 6                     |
| 27                      | MK 727 (2)                | UMMZ 239772                 | <i>S. pentheter</i> | OAXACA    | 16.1916  | -97.0958  | 17,052               | 381   | 247.1              | 2.4            | 10          | 3.0                    | 2                     |
| 28                      | MK 691 (3)                | UMMZ 239651                 | <i>S. chryses</i>   | GUERRERO  | 17.5324  | -99.8994  | 2,267,946            | 2,347 | 663.6              | 35.0           | 4,919       | 33.4                   | 83                    |
| 29                      | MK 770                    | UMMZ 239802                 | <i>S. hazelae</i>   | OAXACA    | 17.2216  | -96.5839  | 538,500              | 2,066 | 526.2              | 19.8           | 557         | 5.9                    | 44                    |

<sup>1</sup> Map number in Figure 1

<sup>2</sup> The first three-digit number corresponds to a sampling location. If there is a second number in parentheses, this corresponds to different aquaria where tadpoles were sorted by species before

<sup>3</sup> All specimens are from the University of Michigan Museum of Zoology. One specimen could not be linked to a catalog number.

675

676

677

678

679

680

681

682

683 Table S1. Information and summary statistics on all 45 samples used to determine the ingroup  
 684 for this study.

| Field Number | UMMZ Number | Current Taxonomy                 | State     | Locality                                                                                                                                                           | Latitude  | Longitude   | Trimmed Paired Reads | UCEs | Average UCE length | mtDNA reads | mtDNA average coverage | mtDNA average quality | Fig. 1 Map Number | Accession number |
|--------------|-------------|----------------------------------|-----------|--------------------------------------------------------------------------------------------------------------------------------------------------------------------|-----------|-------------|----------------------|------|--------------------|-------------|------------------------|-----------------------|-------------------|------------------|
| MK 618       | UMMZ 239796 | <i>Sarcophya bistrincta</i>      | MICHOACAN | LOS AZUFRES / SAN PEDRO ROAD                                                                                                                                       | 19.791051 | -100.660542 | 1,889,670            | 2323 | 529.7              | 3381        | 20.8                   | 86                    | 1                 |                  |
| MK 627-31    | UMMZ 239683 | <i>Sarcophya bistrincta</i>      | MICHOACAN | PARQUE BARRANCA DEL CUPATITZIO URUAPAN                                                                                                                             | 19.426646 | -102.073574 | 1,933,019            | 2254 | 370.9              | 3415        | 20.8                   | 85                    | 2                 |                  |
| MK 666       | UMMZ 239745 | <i>Sarcophya bistrincta</i>      | MICHOACAN | 13 KMS ROAD ZITACUARO MACHERO (LITTLE TOWN WHERE THERE IS A MONARCH BUTTERFLY SANCTUARY)                                                                           | 19.3452   | -100.3128   | 2,186,871            | 2350 | 621.3              | 3900        | 23.4                   | 83                    | 3                 |                  |
| MK 600       | UMMZ 239679 | <i>Sarcophya bistrincta</i>      | MEXICO    | CARRETERA VALLE DE BRAVO-SAN PEDRO TENEYAC ARROYO 1 (6860 FEET) (POR ALBARRADA) BOSQUE BIEN CONSERVADO Y HUMEDO                                                    | 19.150083 | -100.1469   | 932,448              | 2174 | 500.8              | 2377        | 15.7                   | 83                    | 4                 |                  |
| MK 600 (1)   | UMMZ 239678 | <i>Sarcophya bistrincta</i>      | MEXICO    | CARRETERA VALLE DE BRAVO-SAN PEDRO TENEYAC ARROYO 1 (6860 FEET) (POR ALBARRADA) BOSQUE BIEN CONSERVADO Y HUMEDO                                                    | 19.150083 | -100.1469   | 1,217,987            | 2267 | 532.8              | 2570        | 16.4                   | 84                    | 4                 |                  |
| MK 645       | UMMZ 239749 | <i>Sarcophya bistrincta</i>      | MORELOS   | 2 KMS OUT OF CUERNAVACA ON THE CUERNAVACA CHALMA RD. (PASSING CONJUNTO CERRADO) OF LA BARRANCA WHERE THE SALTO SAN ANTONIO IS                                      | 18.922402 | -99.244151  | 2,217,054            | 2406 | 532.5              | 3494        | 21.8                   | 86                    | 5                 |                  |
| MK 645 dupe  | UMMZ 239749 | <i>Sarcophya bistrincta</i>      | MORELOS   | 2 KMS OUT OF CUERNAVACA ON THE CUERNAVACA CHALMA RD. (PASSING CONJUNTO CERRADO) OF LA BARRANCA WHERE THE SALTO SAN ANTONIO IS                                      | 18.922402 | -99.244151  | 548,585              | 1964 | 513.0              | 841         | 7.4                    | 60                    | 5                 |                  |
| MK 759       | UMMZ 239701 | <i>Sarcophya bistrincta</i>      | GUERRERO  | CA 100 DEG KMS FROM CIUDAD ALTAMIRANO VIA XTAPA ZHUATANEJO                                                                                                         | 18.0013   | -101.1716   | 1,224,835            | 2199 | 557.6              | 2522        | 16.2                   | 84                    | 6                 |                  |
| MK 760       | UMMZ 239705 | <i>Sarcophya bistrincta</i>      | GUERRERO  | CA 100 DEG KMS FROM CIUDAD ALTAMIRANO VIA XTAPA ZHUATANEJO                                                                                                         | 18.0013   | -101.1716   | 1,074,315            | 2203 | 559.4              | 743         | 6.9                    | 58                    | 6                 |                  |
| MK 760 (2)   | UMMZ 239704 | <i>Sarcophya bistrincta</i>      | GUERRERO  | CA 100 DEG KMS FROM CIUDAD ALTAMIRANO VIA XTAPA ZHUATANEJO                                                                                                         | 18.0013   | -101.1716   | 927,774              | 2246 | 579.2              | 906         | 9.4                    | 6                     | 6                 |                  |
| MK 691 (5)   | UMMZ 239744 | <i>Sarcophya bistrincta</i>      | GUERRERO  | 2-3 KMS IN THE ROAD TO JALEACA FROM POINT WHERE ROAD TRIFURCATE TO PTO. DEL GALLO / YEXTLA / ANDIALEACA.COMMING FROM CARRIZAL DE BRAVO / IN RIVER UNDER THE BRIDGE | 17.5324   | -99.8994    | 2,084,203            | 2353 | 672.5              | 1678        | 11.9                   | 80                    | 7                 |                  |
| MK 650 (1)   | UMMZ 239725 | <i>Sarcophya bistrincta</i>      | GUERRERO  | MOUNTAINS W. OF CHILPANCINGO / TOWN LOS MORROS                                                                                                                     | 17.6843   | -99.80339   | 941,101              | 2124 | 556.6              | 1278        | 9.7                    | 74                    | 8                 |                  |
| MK 650 (2)   | UMMZ 239726 | <i>Sarcophya bistrincta</i>      | GUERRERO  | MOUNTAINS W. OF CHILPANCINGO / TOWN LOS MORROS                                                                                                                     | 17.6843   | -99.80339   | 2,224,898            | 2394 | 506.4              | 1737        | 12.2                   | 79                    | 8                 |                  |
| MK 652       | UMMZ 239727 | <i>Sarcophya bistrincta</i>      | GUERRERO  | MOUNTAINS W. OF CHILPANCINGO / TOWN LOS MORROS                                                                                                                     | 17.6843   | -99.80339   | 3,423,330            | 2444 | 526.0              | 1396        | 10.4                   | 74                    | 8                 |                  |
| MK 671 (4)   | UMMZ 239733 | <i>Sarcophya bistrincta</i>      | GUERRERO  | BEHIND CHICHIHUALCO / ON ROAD TO CARRIZAL DE BRAVO / 2 KMS FROM ENTRONQUE                                                                                          | 17.6407   | -99.6797    | 1,012,300            | 2107 | 557.0              | 842         | 7.4                    | 62                    | 9                 |                  |
| MK 672       | UMMZ 239738 | <i>Sarcophya bistrincta</i>      | GUERRERO  | BEHIND CHICHIHUALCO / ON ROAD TO CARRIZAL DE BRAVO / 2 KMS FROM ENTRONQUE                                                                                          | 17.6407   | -99.6797    | 297,782              | 1667 | 439.8              | 400         | 5.1                    | 41                    | 9                 |                  |
| MK 656 (1)   | UMMZ 239729 | <i>Sarcophya bistrincta</i>      | GUERRERO  | 3 KMS FROM THE TOWN OF OMIITEMI IN THE ROAD OMIITEMI CHILPANCINGO                                                                                                  | 17.552603 | -99.662569  | 580,194              | 1950 | 497.6              | 547         | 5.9                    | 42                    | 10                |                  |
| MK 674 (1)   | UMMZ 239690 | <i>Sarcophya bistrincta</i>      | GUERRERO  | ON ATZACUALOYA HUEYCATENANGO RD.                                                                                                                                   | 17.5087   | -99.1258    | 659,418              | 1941 | 565.4              | 1086        | 8.7                    | 68                    | 11                |                  |
| MK 675 (2)   | UMMZ 239879 | <i>Sarcophya bistrincta</i>      | GUERRERO  | ON ATZACUALOYA HUEYCATENANGO RD.                                                                                                                                   | 17.5087   | -99.1258    | 336,474              | 1565 | 519.1              | 227         | 4.2                    | 24                    | 11                |                  |
| MK 662       | UMMZ 239731 | <i>Sarcophya bistrincta</i>      | GUERRERO  | 1.6 KMS FROM THE TOWN OF TETIPAC ON THE TETIPAC TAXCO ROAD (MAYBE ARROYO LAS DAMAS)                                                                                | 18.635895 | -99.6491    | 1,137,742            | 2130 | 548.7              | 796         | 7.2                    | 56                    | 12                |                  |
| MK 697 (3)   | UMMZ 239789 | <i>Sarcophya bistrincta</i>      | VERACRUZ  | ON ATZOMPAXOXOCOTLA RD. 1.5 KMS FROM XOXOCOTLA                                                                                                                     | 18.6585   | -97.1574    | 1,524,182            | 2214 | 625.6              | 2479        | 16.0                   | 82                    | 13                |                  |
| MK 699 (1)   | UMMZ 239791 | <i>Sarcophya bistrincta</i>      | VERACRUZ  | ON STREAM CROSSING THE TOWN OF XOXOCOTLA                                                                                                                           | 18.6477   | -97.1574    | 1,342,010            | 2206 | 610.9              | 1769        | 12.3                   | 79                    | 13                |                  |
| MK 700 (2)   | UMMZ 239750 | <i>Sarcophya bistrincta</i>      | PUEBLA    | IN THE STREAM LOCATED AFTER THE TOWN OF ZOQUILLAN TURNING DOWN AT THE CENTRO DE SALUD                                                                              | 18.322    | -97.0285    | 2,203,360            | 2298 | 697.8              | 4155        | 24.8                   | 86                    | 14                |                  |
| MK 705 (1)   | UMMZ 239862 | <i>Sarcophya bistrincta</i>      | OAXACA    | 56 KMS FROM TEOITILAN VIA HUAUTLA                                                                                                                                  | 18.1576   | -96.8684    | 2,529,703            | 2417 | 644.6              | 3164        | 19.6                   | 85                    | 15                |                  |
| MK 715       | UMMZ 239755 | <i>Sarcophya bistrincta</i>      | OAXACA    | NEAR "EL TEJOCOTE" (FRENTE AL KINDER)                                                                                                                              | 17.239    | -97.0032    | 347,152              | 1712 | 437.7              | 254         | 4.3                    | 31                    | 16                |                  |
| MK 716 (1)   | UMMZ 239758 | <i>Sarcophya bistrincta</i>      | OAXACA    | ON ROAD BETWEEN THE TOWNS OF SAN JUAN DEL ESTADO AND SAN MIGUEL ALOAPAN                                                                                            | 17.3036   | -96.793     | 52,461               | 594  | 267.4              | 8           | 3.0                    | 1                     | 17                |                  |
| MK 718 (2)   | UMMZ 239765 | <i>Sarcophya bistrincta</i>      | OAXACA    | PASSING SAN MIGUEL ALOAPAN                                                                                                                                         | 17.4211   | -96.6876    | 606,978              | 2014 | 568.6              | 366         | 4.9                    | 37                    | 18                |                  |
| MK 755 (1)   | UMMZ 239786 | <i>Sarcophya bistrincta</i>      | OAXACA    | ON ROAD SAN JUAN ATEPEC SAN MIGUEL ABEJONES                                                                                                                        | 17.4153   | -96.5671    | 871,034              | 2062 | 563.2              | 1022        | 8.4                    | 69                    | 19                |                  |
| MK 751       | UMMZ 239785 | <i>Sarcophya bistrincta</i>      | OAXACA    | 3.8 KMS PASSING "RANCHO TEXAS" ON THE ROAD FROM THE TOWN OF OXTLAN DE JUAREZ                                                                                       | 17.316    | -96.4435    | 1,577,190            | 2342 | 621.5              | 2376        | 15.4                   | 84                    | 20                |                  |
| MK 748 (2)   | UMMZ 239780 | <i>Sarcophya bistrincta</i>      | OAXACA    | CA 37 KMS FROM MITLA ON THE ROAD MITLA AYUTLA                                                                                                                      | 16.9791   | -96.1364    | 91,912               | 1009 | 302.5              | 23          | 3.1                    | 3                     | 22                |                  |
| MK 748 (4)   | UMMZ 239782 | <i>Sarcophya bistrincta</i>      | OAXACA    | CA 37 KMS FROM MITLA ON THE ROAD MITLA AYUTLA                                                                                                                      | 16.9791   | -96.1364    | 1,058,426            | 2170 | 553.8              | 499         | 5.7                    | 42                    | 22                |                  |
| MK 767       | UMMZ 239788 | <i>Sarcophya bistrincta</i>      | OAXACA    | 9.2 KMS E STA MARIA ALBARRADAS / SIERRA MIXE                                                                                                                       | 16.985888 | -96.135816  | 1,083,058            | 2206 | 524.7              | 617         | 6.3                    | 52                    | 22                |                  |
| MK 721       | UMMZ 239767 | <i>Sarcophya bistrincta</i>      | OAXACA    | 2 KMS N. THE TOWN OF STA. MARIA LIXICHIO VIA THE TOWN OF SAN SEBASTIAN RIO DULCE                                                                                   | 16.7377   | -97.0384    | 146,471              | 1215 | 376.0              | 62          | 3.3                    | 10                    | 23                |                  |
| MK 766       | UMMZ 239794 | <i>Sarcophya bistrincta</i>      | OAXACA    | CERRO DE VIDRIO VIA A PUERTO ESCONDIDO                                                                                                                             | 16.25216  | -97.15359   | 994,521              | 2166 | 577.4              | 467         | 5.5                    | 43                    | 24                |                  |
| MK 730 (2)   | ?           | <i>Sarcophya bistrincta</i>      | ?         | ?                                                                                                                                                                  |           |             | 2,967,630            | 2404 | 716.9              | 3581        | 21.7                   | 84                    |                   |                  |
| MK 685 (2)   | UMMZ 239739 | <i>Sarcophya sp. nov.</i>        | GUERRERO  | ON ATOYAC PTO DE GALLO RD. / BETWEEN 10 - 20 KMS NORTH OF THE TOWN "EL PARAISO"                                                                                    | 17.3812   | -100.2009   | 269,729              | 1645 | 450.6              | 184         | 4.0                    | 20                    | 25                |                  |
| MK 689 (2)   | UMMZ 239740 | <i>Sarcophya sp. nov.</i>        | GUERRERO  | ON ATOYAC PTO DEL GALLO RD. / 500 M. NORTH OF THE TOWN OF SAN VICENTE                                                                                              | 17.3      | -100.2792   | 67,313               | 502  | 221.6              | 32          | 3.1                    | 6                     | 26                |                  |
| MK 727 (2)   | UMMZ 239772 | <i>Sarcophya pentheter</i>       | OAXACA    | RIO "EL SALADO" / 8 KMS N SAN JUAN LACHAO ON HWY 135                                                                                                               | 16.1916   | -97.0958    | 17,052               | 381  | 247.1              | 10          | 3.0                    | 2                     | 27                |                  |
| MK 691 (3)   | UMMZ 239651 | <i>Plectrohyla chryses</i>       | GUERRERO  | 2-3 KMS IN THE ROAD TO JALEACA FROM POINT WHERE ROAD TRIFURCATE TO PTO. DEL GALLO / YEXTLA / ANDIALEACA.COMMING FROM CARRIZAL DE BRAVO / IN RIVER UNDER THE BRIDGE | 17.5324   | -99.8994    | 2,267,946            | 2347 | 663.6              | 4919        | 33.4                   | 83                    | 28                |                  |
| MK 770       | UMMZ 239802 | <i>Plectrohyla hazelae</i>       | OAXACA    | EL PUNTO SIERRA JUAREZ                                                                                                                                             | 17.22156  | -96.58386   | 538,500              | 2066 | 526.2              | 557         | 5.9                    | 44                    | 29                |                  |
| MK 667       | UMMZ 239952 | <i>Sarcophyla arborescendens</i> | VERACRUZ  | PUERTO DEL AIRE (ABRIBA DE ALCUTZINGO)                                                                                                                             | 18.6787   | -97.3485    | 923,330              | 2116 | 511.8              | 1154        | 9.0                    | 69                    |                   |                  |
| MK 700 (1)   | UMMZ 239813 | <i>Sarcophyla cyclada</i>        | PUEBLA    | IN THE STREAM LOCATED AFTER THE TOWN OF ZOQUILLAN TURNING DOWN AT THE CENTRO DE SALUD                                                                              | 18.322    | -97.0285    | 2,490,616            | 2385 | 661.4              | 2961        | 16.4                   | 82                    |                   |                  |
| MK 701       | UMMZ 239814 | <i>Sarcophyla cyclada</i>        | OAXACA    | 24 KMS FROM THE TOWN OF TEOITILAN DE FLORES MAGON VIA HUAUTLA DE JIMENEZ                                                                                           | 18.1781   | -97.0054    | 1,166,574            | 2129 | 565.5              | 1061        | 8.7                    | 69                    |                   |                  |
| MK 742 (1)   | UMMZ 239954 | <i>Sarcophyla arborescendens</i> | VERACRUZ  | LEFT ROAD BIFURCATING FROM ROAD TO THE TOWN OF "LAS MINAS"                                                                                                         | 19.6758   | -97.1751    | 1,074,225            | 2240 | 553.8              | 1750        | 12.0                   | 79                    |                   |                  |
| MK 768       | UMMZ 239833 | <i>Exerodonta xera</i>           | PUEBLA    | 5 KM SW ZAPOTITLAN DE SALINAS                                                                                                                                      | 18.311958 | -97.51266   | 1,257,938            | 2288 | 581.5              | 3506        | 21.4                   | 84                    |                   |                  |

685  
686

687 **Additional Files**

688 Fig. S1. Sampled and unsampled parts of *S. bistrincta* range in relation to known distributions (or  
 689 localities, where distributional information is lacking) of other *Sarcohyala* species.

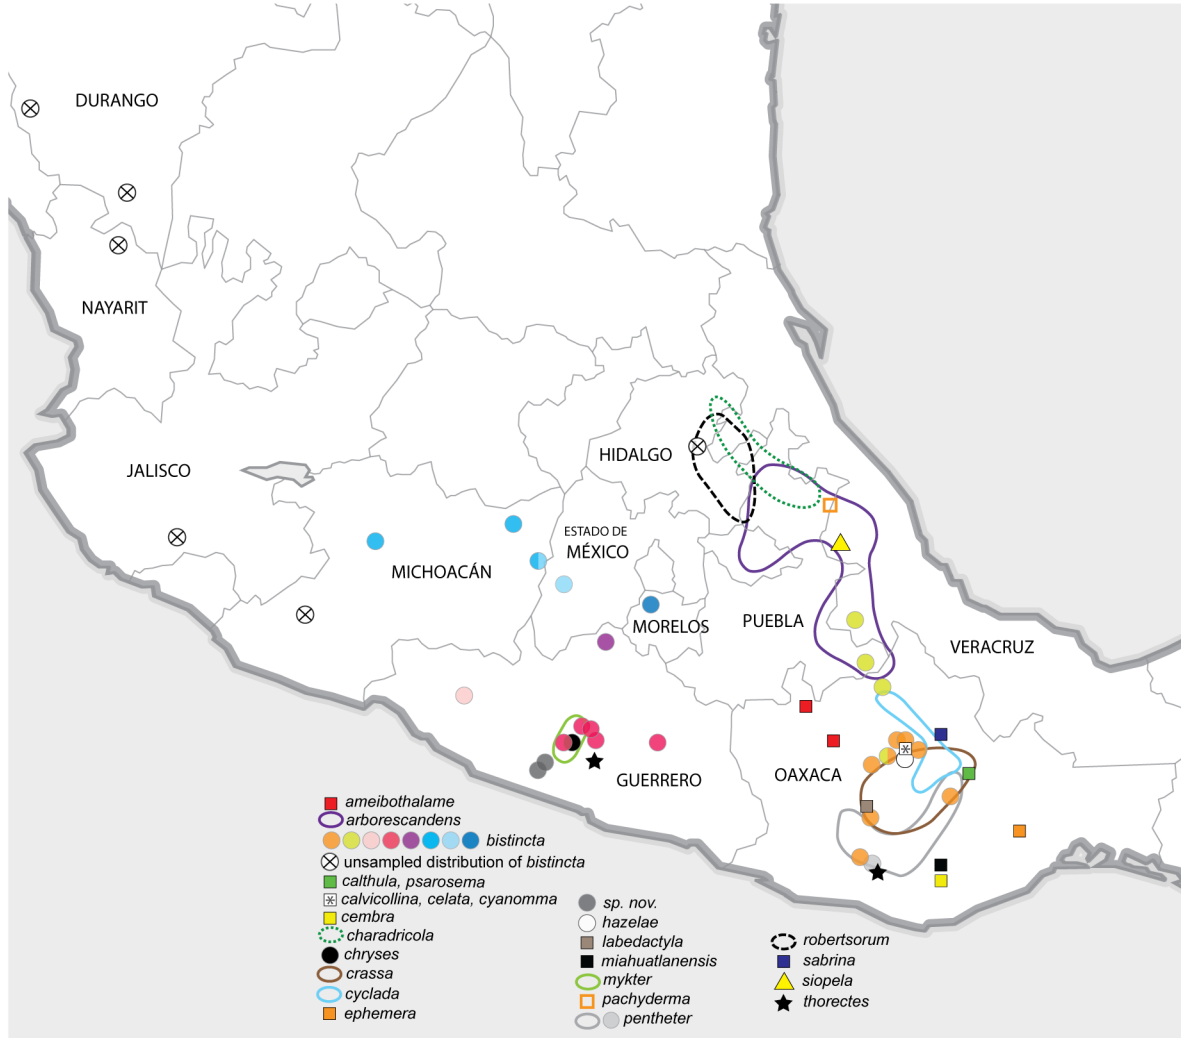

698 Fig. S2. UCE tree of 45 samples of *Sarcohyia* and outgroup *Exerodonta xera* used to determine the  
699 ingroup.

700

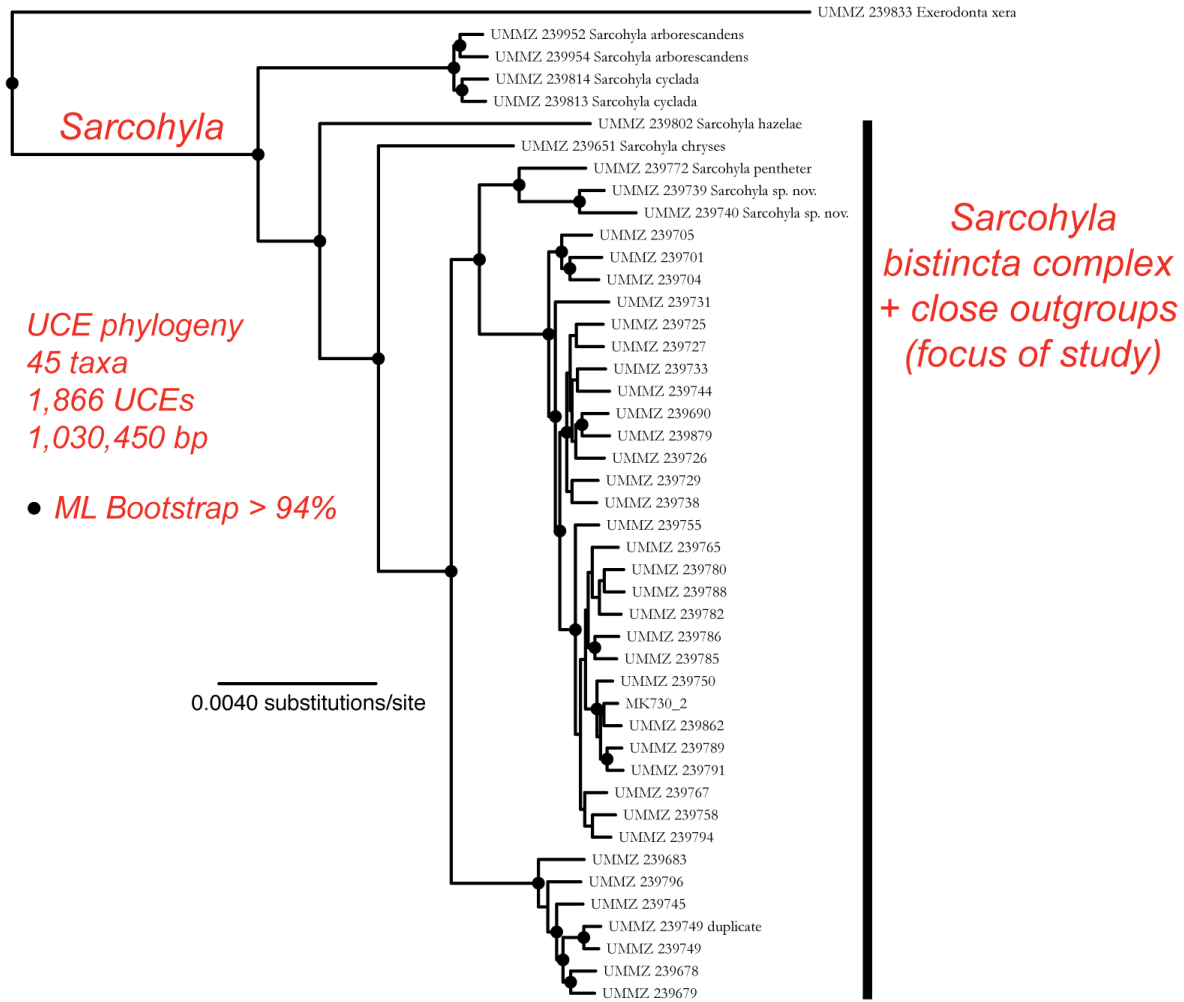

701
